# Supplementary material for: Targeting of multiple myeloma-related angiogenesis by miR-199a-5p mimics: in vitro and in vivo anti-tumor activity
Source: PubMed Central journal article supplement (PMC4102790; doi:10.18632/oncotarget.1747), 2014-03-14
Supplement: oncotarget-05-3039-s002.pdf [file oncotarget-05-3039-s002.pdf]

Targeting of multiple myeloma-related angiogenesis by miR-199a-5p mimics: in vitro and in vivo anti-tumor activity – Raimondi et al

|             | <b>Amplicon</b> | <b>Primer Sequence</b>                                                                                                                    | <b>Annealing Temperature (°C)</b> |
|-------------|-----------------|-------------------------------------------------------------------------------------------------------------------------------------------|-----------------------------------|
| Promoter 1a | Amplicon 1      | For 5'- <b>AGGAAGAGAG</b> AATAGGTAGTTTGAATATTGGGTTGG -3'<br>Rev 5'- <b>CAGTAATACGACTCACTATAGGGAGAAGGCT</b> AAAAATCAAACATTCCCTCCTAAACC -3' | 58                                |
|             | Amplicon 2      | For 5'- <b>AGGAAGAGAG</b> TATTTGGAGAAAGTTTTGGGTTTTT -3'<br>Rev 5'- <b>CAGTAATACGACTCACTATAGGGAGAAGGCT</b> CAAACCATTCCAACCTAATACCACAT -3'  | 52                                |
|             | Amplicon 3      | For 5'- <b>AGGAAGAGAG</b> ATGTGGTATTAGTTGGAATGGTTTG -3'<br>Rev 5'- <b>CAGTAATACGACTCACTATAGGGAGAAGGCT</b> AATAACACAAAACCTAAATCCCTCC -3'   | 58                                |
| Promoter 2a | Amplicon 2      | For 5'- <b>AGGAAGAGAG</b> TGGGGTTTATTTTTTGTTTAGTTGA -3'<br>Rev 5'- <b>CAGTAATACGACTCACTATAGGGAGAAGGCT</b> ACAAAATCTCCAAAACTTCCTTCT -3'    | 52                                |
|             | Amplicon 9      | For 5'- <b>AGGAAGAGAG</b> AAGGAAGTTTTTGGAGATTTTGT -3'<br>Rev 5'- <b>CAGTAATACGACTCACTATAGGGAGAAGGCT</b> ATCTTCTCCTTAAAAACAACCCATT -3'     | 52                                |

T7-promoter tag and 10-mer tag sequence added to the reverse and forward primers, respectively, are indicated in bold.
